# Supplementary material for: Metrology of Short-Length Measurers—Development of a Comparator for the Calibration of Measurers Based on Image Processing and Interferometric Measurements
Source: MDPI journal article supplement (doi:10.3390/s24051573), 2024-02-29
Supplement: s1 [file s1]

# Calibration certificate no. 09/2022

Page  
1/7

## Leveling staff (type, no.):

GPLE3N,, no. 47068

## Calibration range [m]:

0,12043 - 2,87934

## Comparator:

Horizontal comparator

## Contract:

██████

## Date:

3.9.2022

## Laboratory of metrology of short lengths

Slovak University of Technology in Bratislava

Faculty of Civil Engineering

Department of Surveying

Radlinského 11

810 05 Bratislava

tel. ██████████

email: alojz.kopacik@stuba.sk

## Coefficient of expansion (standardized value):

$$\alpha_{TN} = 0,36 \text{ ppm} \cdot ^\circ\text{C}^{-1}$$

## Position of the leveling staff during calibration:

horizontal

## Determination of scale factor:

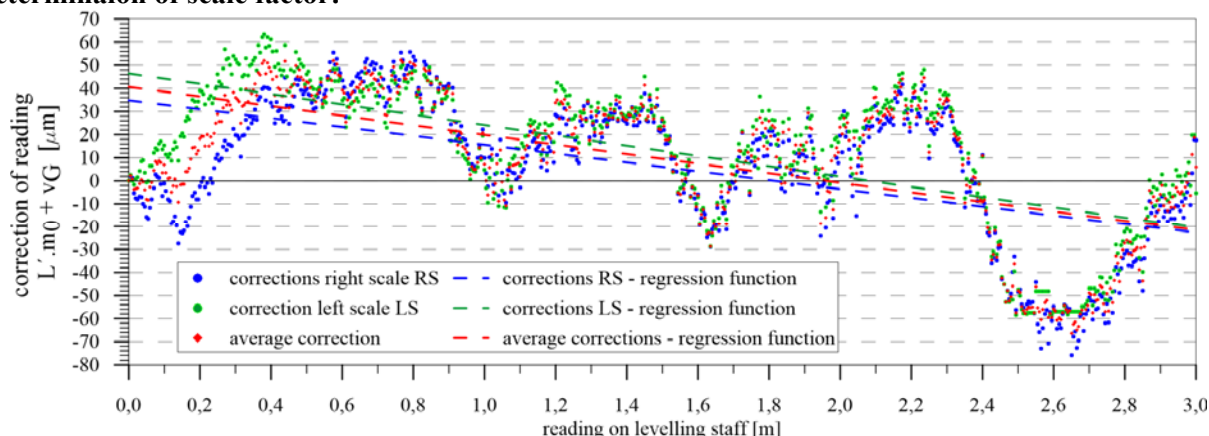

## Scale factor:

$$m_0 = -20.73 \pm 0,02 \text{ ppm}$$

$$T_0 = 20,8^\circ\text{C}$$

$$v_G = 12 \cdot 10^{-6} \text{ m}$$

## Reading on the levelling staff after correction:

$$L = L' \cdot [1 + m_0 + \alpha_T \cdot (T - T_0) \cdot 10^{-6}] + v_G$$

$L'$ [m]

measured value

$m_0$

scale factor

$T$ [°C]

temperature during measurement

$\alpha_T$ [ppm · °C<sup>-1</sup>]

coefficient of expansion

$T_0$ [°C]

temperature during calibration

$v_G$ [m]

index correction

## Determination of scale factor:

### 1. right scale:

scale factor:

-19.16 ppm ± 0,02 ppm

Average temperature

20,8 °C

Average atmospheric pressure:

999,0 hPa

Average deviation of measurements:

± 1.92 μm

### 2. right scale:

scale factor:

-22.30 ppm ± 0,03 ppm

Average temperature

20,9 °C

Average atmospheric pressure:

999,0 hPa

Average deviation of measurements:

± 2.05 μm

### Average from both scales:

scale factor:

-20.73 ppm ± 0,02 ppm

Average temperature

20,8 °C

Average atmospheric pressure:

999,0 hPa

Average deviation of measurements:

± 1.89 μm

# Calibration certificate no. 09/2022

Page  
2/7

Leveling staff (type, no.):

GPLE3N,, no. 47068

Contract:

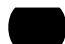

Calibration range [m]:

0,12043 - 2,87934

Date

3.9.2022

## Corrections for the center of the right scale of the levelling staff [ $\mu\text{m}$ ]:

|    | 0      | 1     | 2     | 3     | 4     | 5      | 6     | 7     | 8      | 9      |
|----|--------|-------|-------|-------|-------|--------|-------|-------|--------|--------|
| 0  |        |       |       |       |       |        |       |       |        | 0.00   |
| 1  | 0.00   | 8.79  | 39.24 | 29.80 | 15.66 | 26.11  | 16.47 | 11.89 | -4.78  | -67.78 |
| 2  | 0.00   | 9.75  | 45.05 | 34.12 | 6.07  | 25.56  | 6.46  | 3.63  | 7.70   | -65.71 |
| 3  | 0.00   | 14.78 | 51.37 | 44.91 | 8.95  | 35.11  | 17.83 | 16.75 | -4.65  | -72.72 |
| 4  | 0.00   | 17.34 | 47.51 | 39.95 | 18.45 | 29.51  | 13.42 | 22.34 | 0.41   | -69.67 |
| 5  | 0.00   | 13.41 | 55.43 | 41.87 | 4.38  | 25.45  | 18.37 | 23.80 | -1.15  | -58.97 |
| 6  | 0.00   | 15.77 | 50.37 | 33.49 | 14.70 | 31.74  | 20.42 | 18.66 | -1.19  | -58.05 |
| 7  | 0.00   | 15.52 | 52.67 | 40.67 | 12.84 | 32.60  | 10.63 | 23.49 | -8.75  | -65.45 |
| 8  | 0.00   | 15.18 | 48.31 | 40.10 | 16.87 | 21.81  | 18.87 | 23.79 | -1.27  | -58.15 |
| 9  | 0.00   | 22.50 | 46.48 | 40.88 | 8.03  | 21.12  | 10.88 | 31.95 | -8.58  | -56.25 |
| 10 | 0.00   | 19.73 | 43.45 | 41.89 | 28.73 | 25.64  | 21.44 | 32.49 | 11.19  | -50.98 |
| 11 | 2.06   | 19.47 | 40.39 | 24.48 | 27.78 | 22.07  | 15.76 | 26.68 | -9.66  | -52.36 |
| 12 | 1.32   | 18.35 | 27.61 | 40.18 | 20.45 | 15.95  | 21.48 | 21.37 | -14.14 | -60.55 |
| 13 | -5.40  | 10.42 | 37.81 | 30.02 | 27.33 | 16.40  | 19.46 | 22.61 | -22.89 | -52.49 |
| 14 | -7.52  | 19.49 | 36.36 | 25.35 | 27.03 | 19.28  | 5.13  | 24.35 | -23.95 | -55.96 |
| 15 | -7.95  | 19.77 | 41.42 | 19.09 | 31.32 | 9.46   | 15.41 | 24.60 | -36.08 | -55.52 |
| 16 | -6.78  | 26.45 | 42.72 | 19.96 | 24.39 | 4.43   | 6.30  | 27.31 | -33.58 | -49.74 |
| 17 | -7.03  | 22.74 | 38.77 | 23.78 | 19.37 | 9.68   | -3.42 | 26.12 | -22.89 | -50.72 |
| 18 | -10.01 | 27.85 | 44.98 | 18.30 | 26.72 | 3.95   | 16.75 | 25.33 | -34.99 | -58.29 |
| 19 | -11.28 | 25.00 | 46.42 | 17.73 | 13.37 | -5.51  | -4.72 | 27.08 | -29.41 | -62.05 |
| 20 | -15.58 | 26.66 | 44.48 | 15.65 | 13.83 | -8.73  | 5.89  | 24.27 | -29.33 | -53.68 |
| 21 | -16.46 | 30.78 | 47.31 | 11.55 | 17.72 | -3.01  | 17.57 | 35.73 | -43.09 | -61.79 |
| 22 | -11.78 | 26.32 | 42.98 | 5.01  | 9.02  | -5.04  | 3.22  | 34.14 | -45.33 | -51.36 |
| 23 | -8.08  | 35.12 | 51.28 | 7.27  | 7.72  | -0.51  | -1.64 | 38.82 | -52.82 | -57.65 |
| 24 | -3.25  | 36.28 | 52.68 | 5.83  | 25.96 | 3.09   | 4.67  | 37.79 | -47.92 | -48.10 |
| 25 | 2.80   | 39.63 | 47.68 | 6.15  | 23.93 | 4.15   | 11.76 | 41.64 | -51.63 | -37.89 |
| 26 | 1.68   | 40.48 | 49.99 | 10.00 | 32.21 | -6.48  | 1.69  | 24.51 | -49.25 | -40.75 |
| 27 | 1.38   | 34.82 | 51.36 | 14.76 | 26.83 | -2.79  | 10.43 | 29.99 | -39.78 | -48.91 |
| 28 | -1.37  | 40.15 | 48.39 | 10.39 | 33.59 | -7.53  | 11.56 | 26.85 | -33.25 | -38.27 |
| 29 | -6.52  | 39.68 | 50.45 | 22.28 | 18.84 | -12.46 | 11.43 | 21.30 | -56.28 | -33.92 |
| 30 | -1.29  | 33.69 | 43.49 | 9.80  | 27.61 | -5.82  | 3.51  | 30.33 | -48.49 | -32.02 |
| 31 | -4.27  | 32.15 | 36.79 | 3.37  | 24.12 | -19.43 | 10.46 | 36.07 | -47.37 | -30.76 |
| 32 | -8.02  | 24.91 | 49.01 | -2.36 | 19.53 | -16.07 | 27.40 | 36.07 | -53.81 | -37.13 |
| 33 | -8.89  | 33.99 | 43.87 | 10.26 | 25.98 | -12.93 | 19.19 | 24.36 | -55.44 | -31.57 |
| 34 | -18.53 | 30.06 | 31.97 | 13.72 | 29.61 | -14.43 | 16.93 | 29.13 | -57.90 | -37.26 |
| 35 | -17.67 | 30.94 | 33.71 | -1.58 | 16.84 | -24.69 | 9.71  | 27.96 | -53.93 | -35.66 |

Technical specialist: Ing. Pavol Kajánek, PhD.

Bratislava, 3.9.2022

Laboratory director: doc. Ing. Ján Erdélyi, PhD.

Institute director: prof. Ing. Alojz Kopáček, PhD.

# Calibration certificate no. 09/2022

Page  
3/7**Leveling staff (type, no.):**

GPLE3N,, no. 47068

**Contract:**

**Date**

**Calibration range [m]:**

0,12043 - 2,87934

3.9.2022

### Corrections for the center of the right scale of the levelling staff [μm]

|    | 0      | 1     | 2     | 3     | 4     | 5      | 6      | 7      | 8      | 9      |
|----|--------|-------|-------|-------|-------|--------|--------|--------|--------|--------|
| 36 | -15.35 | 27.92 | 40.51 | 2.97  | 18.68 | -23.21 | 3.30   | 39.46  | -52.54 | -35.11 |
| 37 | -19.59 | 25.77 | 38.87 | 11.19 | 25.82 | -28.98 | -5.33  | 41.14  | -53.35 | -34.05 |
| 38 | -27.42 | 44.63 | 47.56 | -6.44 | 26.68 | -21.46 | -2.42  | 31.31  | -52.85 | -44.03 |
| 39 | -22.51 | 32.64 | 51.43 | 17.85 | 23.44 | -20.02 | -24.12 | 24.91  | -57.84 | -34.31 |
| 40 | -23.19 | 24.60 | 45.15 | 3.59  | 26.45 | -19.29 | -2.24  | 9.67   | -44.32 | -47.93 |
| 41 | -21.82 | 32.61 | 41.12 | -5.32 | 29.18 | -11.79 | -1.25  | 22.16  | -62.48 | -33.80 |
| 42 | -17.96 | 32.13 | 43.64 | -9.53 | 26.83 | -21.78 | -20.54 | 21.53  | -66.01 | -20.84 |
| 43 | -19.89 | 36.58 | 55.56 | 4.63  | 29.29 | -7.01  | -9.60  | 20.21  | -73.07 | -25.81 |
| 44 | -16.00 | 43.97 | 52.26 | 4.57  | 33.10 | -13.99 | -8.51  | 22.23  | -64.15 | -8.86  |
| 45 | -11.35 | 41.30 | 45.80 | -4.84 | 25.99 | -13.79 | 2.32   | 25.02  | -57.92 | -14.00 |
| 46 | -6.50  | 43.66 | 48.24 | 3.57  | 31.58 | -21.31 | -16.26 | 31.50  | -56.23 | -11.28 |
| 47 | -5.20  | 39.24 | 49.80 | 3.29  | 29.06 | -8.68  | 3.79   | 23.85  | -70.86 | -19.60 |
| 48 | -8.00  | 37.39 | 55.58 | 0.46  | 26.46 | -3.29  | 9.89   | 29.41  | -57.26 | -13.49 |
| 49 | -8.01  | 38.93 | 49.03 | 1.51  | 26.01 | -0.44  | 7.80   | 31.34  | -60.93 | -17.54 |
| 50 | -2.44  | 39.66 | 53.63 | -2.85 | 24.75 | -0.82  | 19.57  | 34.58  | -54.74 | -10.70 |
| 51 | -0.44  | 37.58 | 52.07 | 3.68  | 27.91 | -3.21  | 12.49  | 32.16  | -56.74 | -6.76  |
| 52 | 1.27   | 37.09 | 37.85 | 4.97  | 28.12 | 4.03   | 30.11  | 28.06  | -64.40 | -15.74 |
| 53 | -2.75  | 33.69 | 40.26 | 8.01  | 31.75 | 10.23  | 18.89  | 25.69  | -62.48 | -13.14 |
| 54 | -0.94  | 31.14 | 37.50 | 10.95 | 23.94 | 12.98  | 21.16  | 17.82  | -64.16 | -17.64 |
| 55 | -5.51  | 31.57 | 31.28 | 14.55 | 28.58 | 20.64  | 13.70  | 16.79  | -58.07 | -13.30 |
| 56 | 1.11   | 36.13 | 51.44 | 21.29 | 24.01 | 3.65   | 2.08   | 15.38  | -54.19 | -16.39 |
| 57 | -0.84  | 38.11 | 50.00 | 16.92 | 25.36 | 3.77   | -6.52  | 15.87  | -54.80 | -12.03 |
| 58 | 5.55   | 41.09 | 43.35 | 18.37 | 30.37 | 9.80   | 15.43  | 12.73  | -56.16 | -16.45 |
| 59 | 9.77   | 34.67 | 46.56 | 13.52 | 31.72 | -6.09  | -15.12 | 4.33   | -55.77 | -10.67 |
| 60 | 11.41  | 37.35 | 41.76 | 14.70 | 37.63 | 8.16   | 6.37   | -11.51 | -75.88 | -11.05 |

Technical specialist: Ing. Pavol Kajánek, PhD.

Bratislava, 3.9.2022

Laboratory director: doc. Ing. Ján Erdélyi, PhD.

Institute director: prof. Ing. Alojz Kopáček, PhD.
