# Supplementary material for: Metrology of Short-Length Measurers—Development of a Comparator for the Calibration of Measurers Based on Image Processing and Interferometric Measurements
Source: MDPI journal article supplement (doi:10.3390/s24051573), 2024-02-29
Supplement: s1 [file s1]

# Calibration certificate no. 01/2019

Page  
1/3

## Leveling staff (type, no.):

GPCL3,, no. 32316

## Calibration range [the order of the scale division]:

9-682

## Comparator:

Horizontal comparator

## Contract:

[REDACTED]

## Date:

13.12.2018

## Laboratory of metrology of short lengths

Slovak University of Technology in Bratislava

Faculty of Civil Engineering

Department of Surveying

Radlinského 11

810 05 Bratislava

tel. [REDACTED]

email: [REDACTED]

## Coefficient of expansion (standardized value):

$$\alpha_{TN} = 0,50 \text{ ppm} \cdot ^\circ\text{C}^{-1}$$

## Position of the leveling staff during calibration:

horizontal

## Determination of scale factor:

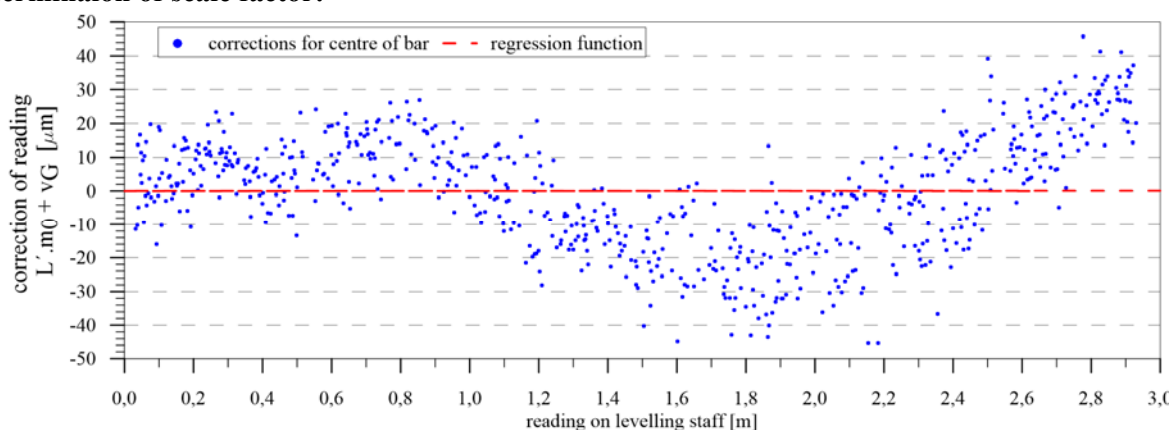

## Scale factor:

$$m_0 = -0.04 \pm 0,02 \text{ ppm}$$

$$T_0 = 20,2^\circ\text{C}$$

$$v_G = -34 \cdot 10^{-6} \text{ m}$$

## Reading on the levelling staff after correction:

$$L = L' \cdot [1 + m_0 + \alpha_T \cdot (T - T_0) \cdot 10^{-6}] + v_G$$

$L'$ [m]

measured value

$m_0$

scale factor

$T$ [°C]

temperature during measurement

$\alpha_T$ [ppm · °C<sup>-1</sup>]

coefficient of expansion

$T_0$ [°C]

temperature during calibration

$v_G$ [m]

index correction

## Determination of scale factor:

### 1<sup>st</sup> measurement:

scale factor:

$$0.0341 \text{ ppm} \pm 0,020 \text{ ppm}$$

Average temperature

20,4 °C

Average atmospheric pressure:

1003.9 hPa

Average deviation of measurements:

± 5.83 μm

### 2<sup>nd</sup> measurement:

scale factor:

$$0.0417 \text{ ppm} \pm 0,036 \text{ ppm}$$

Average temperature

20,0 °C

Average atmospheric pressure:

1005,7 hPa

Average deviation of measurements:

± 5,75 μm

## Average from both measurement:

scale factor:

$$0.0379 \text{ ppm} \pm 0,028 \text{ ppm}$$

Average temperature

20,2 °C

Average atmospheric pressure:

1004.8 hPa

Average deviation of measurements:

± 5.79 μm

# Calibration certificate no. 01/2019

Page  
2/3

Leveling staff (type, no.):

GPCL3,, no. 32316

Contract:

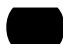

Calibration range [the order of the scale division]:

9-682

Date

13.12.2018

## Corrections for the centre of the division of the leveling staff scale [ $\mu\text{m}$ ]:

|     | 0      | 1      | 2      | 3      | 4      | 5      | 6      | 7      | 8      | 9      |
|-----|--------|--------|--------|--------|--------|--------|--------|--------|--------|--------|
| 0   |        |        |        |        |        |        |        |        |        | -11.44 |
| 10  | -10.19 | 13.77  | -4.88  | 16.66  | 4.83   | 11.38  | 2.32   | 9.17   | -9.47  | 10.45  |
| 20  | -1.41  | 14.61  | -4.10  | -0.72  | 3.64   | 19.77  | -1.81  | -3.10  | 1.35   | -15.95 |
| 30  | -1.35  | 18.92  | 3.71   | 17.93  | -10.18 | 5.41   | -2.84  | 9.24   | 3.99   | 4.59   |
| 40  | 1.48   | -2.21  | -0.66  | 13.31  | 2.16   | 1.51   | 2.19   | 8.12   | -5.99  | 12.28  |
| 50  | 2.66   | 15.63  | 12.63  | 14.79  | -5.85  | 12.86  | 6.11   | -10.81 | -1.19  | 5.19   |
| 60  | 9.37   | 12.13  | 0.30   | 13.72  | 11.28  | 7.54   | 1.60   | 6.44   | 12.63  | 12.74  |
| 70  | 10.87  | 19.55  | 14.39  | 11.68  | 10.59  | 8.26   | 23.36  | 4.31   | 20.72  | -1.80  |
| 80  | 11.20  | 12.57  | 11.54  | 6.10   | 17.53  | 7.80   | 9.89   | 11.35  | 7.60   | 9.03   |
| 90  | 13.07  | 7.85   | 22.86  | 7.37   | 11.31  | -0.85  | 8.54   | 9.26   | 3.16   | 2.12   |
| 100 | 6.86   | 7.45   | 2.85   | -1.77  | -7.62  | 5.61   | 6.06   | 6.76   | 9.53   | 4.17   |
| 110 | -1.15  | -3.73  | -0.54  | 4.88   | -9.35  | 12.52  | -6.52  | -6.59  | 2.94   | 3.40   |
| 120 | -1.06  | 4.24   | -4.24  | 1.33   | 15.16  | 11.13  | 5.24   | -2.71  | -0.18  | 13.26  |
| 130 | -7.31  | 9.99   | 3.83   | 10.17  | -7.23  | 14.69  | 6.23   | 5.14   | -13.30 | 1.13   |
| 140 | 23.26  | 11.57  | 10.19  | 3.45   | -2.90  | 24.14  | 6.14   | 8.35   | 8.07   | 4.91   |
| 150 | 5.12   | 17.44  | 3.78   | 19.09  | 10.70  | 19.25  | 1.37   | 7.93   | 9.00   | 20.01  |
| 160 | -1.08  | 11.33  | -3.56  | 22.84  | 17.09  | 16.31  | 18.58  | 13.24  | 2.70   | 14.37  |
| 170 | -5.24  | 14.51  | 13.76  | 2.24   | 16.86  | 10.69  | 16.22  | 20.38  | 18.36  | 16.87  |
| 180 | 10.70  | 11.46  | 9.63   | 11.01  | 4.58   | 9.71   | 18.19  | 20.46  | 0.65   | 21.18  |
| 190 | -2.43  | 14.51  | 15.66  | 26.16  | 4.12   | 20.73  | 3.34   | 13.96  | 21.91  | 13.99  |
| 200 | 6.43   | 26.46  | 20.95  | 22.56  | 10.87  | 20.02  | 9.29   | 27.07  | 1.76   | 17.77  |
| 210 | 21.22  | 17.51  | 17.05  | 18.45  | 8.58   | 13.35  | 3.93   | 19.24  | 7.87   | 9.89   |
| 220 | -1.90  | 14.42  | -0.20  | 1.79   | 8.42   | 3.27   | 7.86   | 11.65  | 6.94   | 20.30  |
| 230 | -6.30  | 15.73  | 1.60   | 6.19   | 18.54  | 10.64  | 4.76   | 10.89  | -1.75  | 7.08   |
| 240 | -4.23  | 7.07   | -7.12  | -6.39  | -9.55  | 10.18  | -6.21  | -0.43  | 10.75  | -1.61  |
| 250 | 4.35   | -2.35  | 3.35   | 13.36  | -1.93  | 13.95  | -7.39  | 9.67   | -9.68  | -12.01 |
| 260 | 1.92   | -3.07  | 0.86   | 10.12  | -2.72  | -11.61 | -9.66  | 8.31   | -10.45 | 16.01  |
| 270 | -21.64 | 10.64  | -16.54 | -5.99  | -19.75 | -0.19  | -18.88 | 3.89   | -18.79 | 20.69  |
| 280 | -17.99 | 11.46  | -24.21 | 7.54   | -28.11 | 2.28   | -7.33  | -6.28  | -8.55  | 1.50   |
| 290 | -13.47 | 9.16   | -17.00 | -16.00 | -14.84 | -7.38  | -6.60  | -12.17 | -7.28  | -17.64 |
| 300 | -16.11 | -10.34 | -17.67 | -14.80 | -9.97  | -4.05  | -13.73 | -4.68  | -23.95 | -8.00  |
| 310 | -10.40 | -14.85 | -14.48 | -13.13 | -17.88 | -22.12 | -8.85  | -8.78  | 0.21   | -5.87  |
| 320 | -11.08 | -11.99 | 0.79   | -3.74  | -16.02 | -7.53  | -9.82  | -14.79 | -22.77 | -5.56  |
| 330 | -6.78  | -10.71 | -12.76 | -19.51 | -15.83 | -17.92 | -16.49 | -13.55 | -25.67 | -10.67 |
| 340 | -20.83 | -21.01 | -27.97 | -22.71 | -28.99 | -18.21 | -40.22 | -11.84 | -14.13 | -14.31 |
| 350 | -21.32 | -1.52  | -34.23 | -24.02 | -26.96 | -18.38 | -22.54 | -9.18  | -20.46 | -7.95  |

Technical specialist: Ing. Pavol Kajánek, PhD.

Bratislava, 13.12.2018

Laboratory director: doc. Ing. Ján Erdélyi, PhD.

Institute director: prof. Ing. Alojz Kopáček, PhD.

# Calibration certificate no. 01/2019

Page  
3/3

Leveling staff (type, no.):

GPCL3,, no. 32316

Contract:

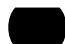

Calibration range [the order of the scale division]:

9-682

Date

13.12.2018

## Corrections for the centre of the division of the leveling staff scale [ $\mu\text{m}$ ]:

|     | 0      | 1      | 2      | 3      | 4      | 5      | 6      | 7      | 8      | 9      |
|-----|--------|--------|--------|--------|--------|--------|--------|--------|--------|--------|
| 360 | -25.51 | -17.40 | -12.75 | -6.83  | -23.92 | -7.46  | -44.85 | 0.37   | -25.96 | -4.70  |
| 370 | -31.62 | -7.52  | -28.00 | -6.61  | -28.51 | 1.29   | -13.42 | -2.72  | -28.46 | 2.15   |
| 380 | -23.63 | -26.29 | -22.25 | -17.15 | -23.36 | -3.63  | -21.07 | -23.86 | -11.87 | -23.21 |
| 390 | -30.83 | -28.55 | -31.92 | -26.60 | -31.92 | -17.08 | -42.89 | -12.64 | -35.47 | -14.44 |
| 400 | -31.95 | -19.88 | -23.49 | -18.41 | -16.83 | -29.00 | -34.56 | -20.35 | -21.16 | -10.31 |
| 410 | -43.01 | -18.19 | -29.42 | -10.95 | -34.15 | -22.88 | -37.96 | -21.74 | -31.19 | -19.08 |
| 420 | -36.78 | -6.12  | -43.48 | 13.31  | -40.16 | -10.33 | -19.91 | 2.36   | -36.30 | -11.79 |
| 430 | -33.02 | -3.58  | -31.94 | -11.89 | -26.85 | -12.13 | -32.01 | -5.91  | -32.11 | -14.11 |
| 440 | -30.99 | -18.01 | -21.95 | -22.11 | -10.84 | -18.78 | -18.80 | -6.36  | -25.87 | -7.22  |
| 450 | -32.07 | -17.66 | -29.14 | -13.09 | -17.04 | -5.13  | -12.50 | -1.90  | -24.48 | -18.80 |
| 460 | -16.05 | -3.01  | -36.14 | -0.93  | -18.11 | -7.58  | -30.41 | -5.39  | -34.12 | -1.12  |
| 470 | -26.62 | -14.65 | -28.64 | -6.90  | -16.00 | -0.91  | -30.20 | -4.71  | -26.99 | -4.62  |
| 480 | -25.45 | 3.68   | -15.66 | -0.98  | -24.02 | -1.31  | -23.66 | -2.22  | -17.18 | 1.13   |
| 490 | -30.41 | 8.48   | -28.92 | -1.13  | -45.34 | -45.34 | -5.65  | -0.59  | 4.51   | 9.77   |
| 500 | -2.63  | -1.29  | -11.18 | 2.71   | -11.55 | -10.06 | -12.52 | 6.93   | -22.24 | 12.83  |
| 510 | -24.87 | -1.37  | -4.88  | 1.36   | -16.66 | -3.56  | -6.60  | 10.72  | -3.92  | -2.33  |
| 520 | -16.50 | -1.71  | -18.00 | -3.08  | -20.65 | -0.27  | -22.59 | 4.58   | -15.90 | -4.28  |
| 530 | -22.30 | 9.87   | -14.99 | 4.69   | -9.80  | 13.51  | -21.27 | 4.65   | -36.73 | 11.54  |
| 540 | -11.87 | 12.23  | -5.10  | 23.75  | -14.88 | 9.41   | -17.85 | 5.90   | -22.91 | 7.85   |
| 550 | -11.19 | 11.20  | -15.61 | 9.85   | -8.42  | 17.39  | -10.94 | 16.53  | -17.63 | 11.70  |
| 560 | -3.70  | 17.63  | -7.96  | 13.63  | -17.23 | 3.38   | -14.61 | 2.95   | -10.02 | 12.30  |
| 570 | -6.83  | 14.79  | -5.13  | 16.24  | -11.75 | 16.61  | 3.08   | 39.20  | -5.39  | 26.82  |
| 580 | 0.30   | 33.83  | 6.01   | 18.22  | 22.97  | 26.24  | 6.65   | 5.94   | 12.42  | 13.83  |
| 590 | 10.40  | 19.21  | 15.35  | 8.18   | -3.39  | 12.84  | 12.99  | 16.69  | 2.29   | 12.47  |
| 600 | 6.48   | 27.21  | 3.41   | 23.41  | 3.67   | 21.70  | 4.02   | 19.20  | 9.21   | 12.09  |
| 610 | 16.32  | 16.67  | 7.19   | 25.24  | 10.90  | 21.41  | 2.94   | 29.94  | 11.03  | 22.16  |
| 620 | 7.02   | 27.22  | 23.44  | 23.15  | 6.39   | 28.89  | 6.45   | 17.16  | -4.89  | 32.11  |
| 630 | 13.77  | 21.27  | 10.19  | 28.94  | 0.90   | 18.24  | 24.86  | 25.59  | 15.98  | 33.88  |
| 640 | 12.05  | 26.59  | 16.43  | 45.67  | 21.26  | 25.29  | 14.00  | 28.66  | 19.13  | 33.38  |
| 650 | 27.05  | 28.75  | 26.09  | 29.32  | 28.92  | 41.21  | 22.80  | 31.43  | 13.58  | 32.77  |
| 660 | 23.81  | 33.95  | 26.36  | 30.46  | 27.18  | 28.97  | 27.14  | 33.79  | 26.90  | 41.14  |
| 670 | 21.08  | 26.93  | 26.63  | 31.03  | 20.36  | 35.68  | 17.52  | 33.76  | 26.42  | 34.95  |
| 680 | 14.38  | 37.24  | 20.11  |        |        |        |        |        |        |        |

Technical specialist: Ing. Pavol Kajánek, PhD.

Bratislava, 13.12.2018

Laboratory director: doc. Ing. Ján Erdélyi, PhD.

Institute director: prof. Ing. Alojz Kopáčik, PhD.
