# Supplementary material for: Metrology of Short-Length Measurers—Development of a Comparator for the Calibration of Measurers Based on Image Processing and Interferometric Measurements
Source: MDPI journal article supplement (doi:10.3390/s24051573), 2024-02-29
Supplement: s1 [file s1]

# Calibration certificate no. 03/2021

Page  
1/2

## Calibrated measurer (type, no.):

30 m steel measuring band on metal - plastic fork,  
no. 3-S12-3005 U-1

## Calibration range [m]:

0.1 - 29.1

## Comparator:

Horizontal comparator

## Contract:

[REDACTED]

## Date:

8.3.2021

## Laboratory of metrology of short lengths

Slovak University of Technology in Bratislava  
Faculty of Civil Engineering  
Department of Surveying  
Radlinského 11  
810 05 Bratislava

email [REDACTED]

## coefficient of expansion (standardized value for steel)

$$\alpha_{TN} = 11 \text{ ppm} \cdot ^\circ\text{C}^{-1}$$

## Position of the measuring tape during calibration: horizontal

## Determination of scale factor:

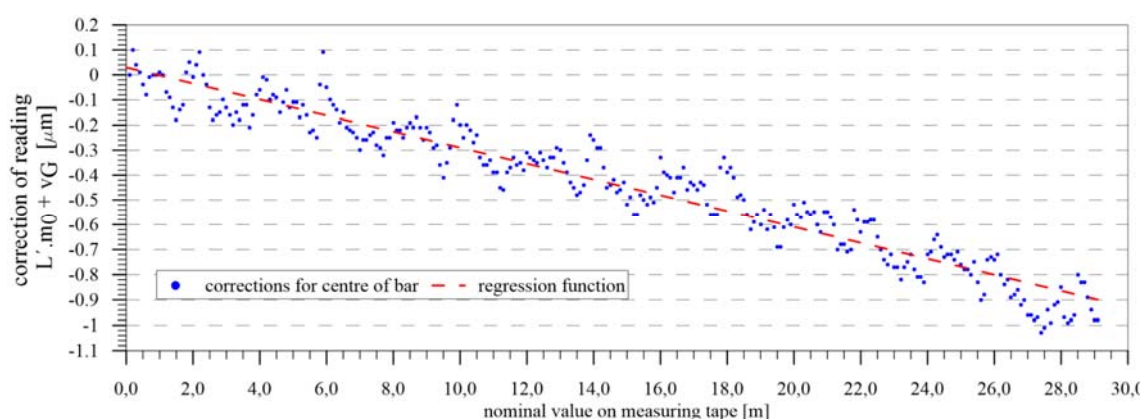

## Scale factor:

$$m_0 = -0,03 \pm 0,0014 \text{ ppm}$$

$$T_0 = 19,8^\circ\text{C}$$

## Reading on the levelling staff after correction:

$$L = L' \cdot [1 + m_0 + \alpha_T \cdot (T - T_0) \cdot 10^{-6}]$$

$L'$ [m]

measured value

$m_0$

scale factor

$T$ [°C]

temperature during measurement

$\alpha_T$ [ppm · °C<sup>-1</sup>]

coefficient of thermal expansion

$T_0$ [°C]

temperature during calibration

of steel

## Determination of scale factor:

### 1<sup>st</sup> measurement:

scale factor:

-0.0250 ppm ± 0,001 ppm

Average temperature

20,2 °C

Average atmospheric pressure:

1016.4 hPa

Average deviation of measurement: ± 0.05 mm

### 2<sup>nd</sup> measurement:

scale factor:

-0.0388 ppm ± 0,001 ppm

Average temperature

19,4 °C

Average atmospheric pressure:

1016.0 hPa

Average deviation of measurement: ± 0.05 mm

## Average from both measurement:

scale factor:

-0.032 ppm. ± 0,001 ppm

Average temperature

19,8 °C

Average atmospheric pressure:

1016.2 hPa

Average deviation of measurement: ± 0.05 mm

# Calibration certificate no. 03/2021

Page  
2/2

**Leveling staff (type, no.):**

30 m steel measuring band on metal - plastic fork,  
no. 3-S12-3005 U-1

**Contract:**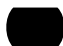**Calibration range [m]:**

0.1-29.1

**Date**

8.3.2021

**Corrections for the centre of the bar from the measuring tape [mm]:**

| m\dm | 0     | 1     | 2     | 3     | 4     | 5     | 6     | 7     | 8     | 9     |
|------|-------|-------|-------|-------|-------|-------|-------|-------|-------|-------|
| 0    | -     | 0.00  | 0.10  | 0.04  | 0.01  | -0.04 | -0.08 | -0.01 | 0.00  | 0.00  |
| 1    | 0.01  | 0.00  | -0.07 | -0.09 | -0.13 | -0.18 | -0.14 | -0.12 | 0.01  | 0.05  |
| 2    | -0.01 | 0.04  | 0.09  | 0.00  | -0.04 | -0.13 | -0.18 | -0.16 | -0.15 | -0.10 |
| 3    | -0.13 | -0.16 | -0.20 | -0.15 | -0.18 | -0.12 | -0.12 | -0.21 | -0.16 | -0.08 |
| 4    | -0.06 | -0.01 | -0.02 | -0.10 | -0.08 | -0.09 | -0.15 | -0.11 | -0.06 | -0.13 |
| 5    | -0.11 | -0.11 | -0.17 | -0.12 | -0.16 | -0.23 | -0.22 | -0.25 | -0.04 | 0.09  |
| 6    | -0.05 | -0.10 | -0.12 | -0.14 | -0.19 | -0.15 | -0.21 | -0.22 | -0.23 | -0.25 |
| 7    | -0.30 | -0.26 | -0.26 | -0.24 | -0.23 | -0.28 | -0.29 | -0.32 | -0.25 | -0.25 |
| 8    | -0.19 | -0.22 | -0.22 | -0.25 | -0.21 | -0.19 | -0.21 | -0.17 | -0.21 | -0.26 |
| 9    | -0.21 | -0.23 | -0.29 | -0.28 | -0.36 | -0.41 | -0.35 | -0.29 | -0.18 | -0.12 |
| 10   | -0.20 | -0.25 | -0.20 | -0.22 | -0.27 | -0.24 | -0.33 | -0.36 | -0.36 | -0.34 |
| 11   | -0.39 | -0.39 | -0.45 | -0.46 | -0.39 | -0.37 | -0.33 | -0.36 | -0.35 | -0.38 |
| 12   | -0.31 | -0.33 | -0.34 | -0.35 | -0.31 | -0.34 | -0.37 | -0.33 | -0.33 | -0.29 |
| 13   | -0.30 | -0.35 | -0.39 | -0.43 | -0.45 | -0.48 | -0.47 | -0.44 | -0.34 | -0.24 |
| 14   | -0.26 | -0.29 | -0.29 | -0.37 | -0.45 | -0.44 | -0.42 | -0.47 | -0.46 | -0.43 |
| 15   | -0.52 | -0.49 | -0.56 | -0.56 | -0.48 | -0.50 | -0.52 | -0.49 | -0.51 | -0.45 |
| 16   | -0.33 | -0.39 | -0.40 | -0.41 | -0.47 | -0.41 | -0.41 | -0.37 | -0.46 | -0.43 |
| 17   | -0.44 | -0.46 | -0.43 | -0.44 | -0.52 | -0.56 | -0.56 | -0.56 | -0.37 | -0.33 |
| 18   | -0.39 | -0.37 | -0.41 | -0.49 | -0.48 | -0.50 | -0.56 | -0.62 | -0.59 | -0.56 |
| 19   | -0.60 | -0.54 | -0.62 | -0.56 | -0.61 | -0.69 | -0.69 | -0.61 | -0.58 | -0.60 |
| 20   | -0.52 | -0.56 | -0.57 | -0.51 | -0.55 | -0.56 | -0.55 | -0.60 | -0.63 | -0.55 |
| 21   | -0.55 | -0.57 | -0.60 | -0.70 | -0.68 | -0.68 | -0.71 | -0.70 | -0.54 | -0.58 |
| 22   | -0.63 | -0.59 | -0.59 | -0.58 | -0.58 | -0.65 | -0.70 | -0.74 | -0.76 | -0.72 |
| 23   | -0.77 | -0.77 | -0.82 | -0.77 | -0.75 | -0.72 | -0.78 | -0.81 | -0.81 | -0.83 |
| 24   | -0.72 | -0.71 | -0.66 | -0.64 | -0.69 | -0.73 | -0.72 | -0.72 | -0.74 | -0.71 |
| 25   | -0.76 | -0.78 | -0.78 | -0.80 | -0.75 | -0.83 | -0.90 | -0.88 | -0.74 | -0.73 |
| 26   | -0.74 | -0.72 | -0.80 | -0.84 | -0.82 | -0.89 | -0.88 | -0.86 | -0.92 | -0.90 |
| 27   | -0.96 | -0.96 | -0.98 | -0.97 | -1.03 | -1.01 | -0.94 | -0.99 | -0.92 | -0.91 |
| 28   | -0.85 | -0.97 | -0.99 | -0.98 | -0.96 | -0.80 | -0.83 | -0.83 | -0.89 | -0.94 |
| 29   | -0.98 | -0.98 | -     | -     | -     | -     | -     | -     | -     | -     |

*note: correction of the reading on the measuring tape can be realized in two ways, namely (1) using the relationship from the first page of this protocol or (2) adding a correction directly interpolated from the correction table mentioned above.*

Technical specialist: Ing. Pavol Kajánek, PhD.

Bratislava, 8.3.2021

Laboratory director: doc. Ing. Ján Erdélyi, PhD.

Institute director: prof. Ing. Alojz Kopáček, PhD.
